# Supplementary material for: Salicylhydroxamic acid as an electro-responsive and switchable adhesive molecule
Source: Royal Society of Chemistry journal article supplement (doi:10.1039/d5sc07881d), 2026-04-02
Supplement: d5sc07881d2.pdf [file d5sc07881d2.pdf]

## Supporting Information

# Salicylhydroxamic acid as an electro-responsive and switchable adhesive molecule

*Kan Wang, Vedika Khare, Abhilash Arjan Das, Seyedehfatemeh Razaviamri, and Bruce P. Lee\**

Department of Biomedical Engineering, Michigan Technological University, 1400 Townsend  
Drive, Houghton, Michigan, 49931, United States

\* Correspondence: Bruce P. Lee,  
E-mail: [bplee@mtu.edu](mailto:bplee@mtu.edu)

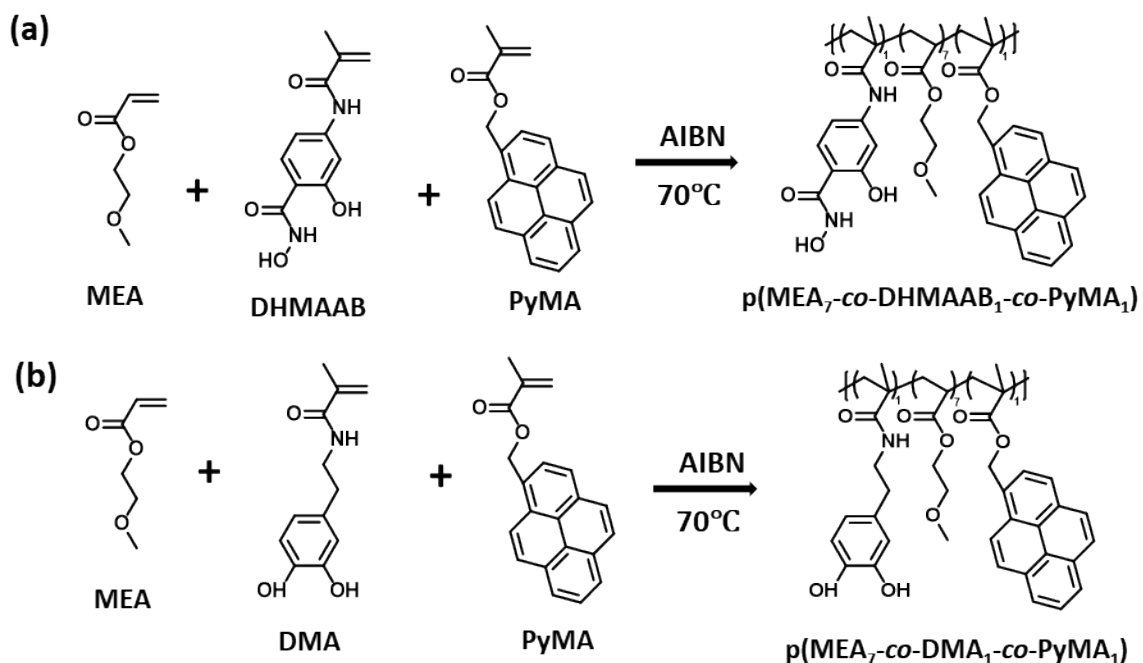

**Figure S1.** Thermo-initiated polymerization to prepare the adhesive copolymers SHA and CAT.

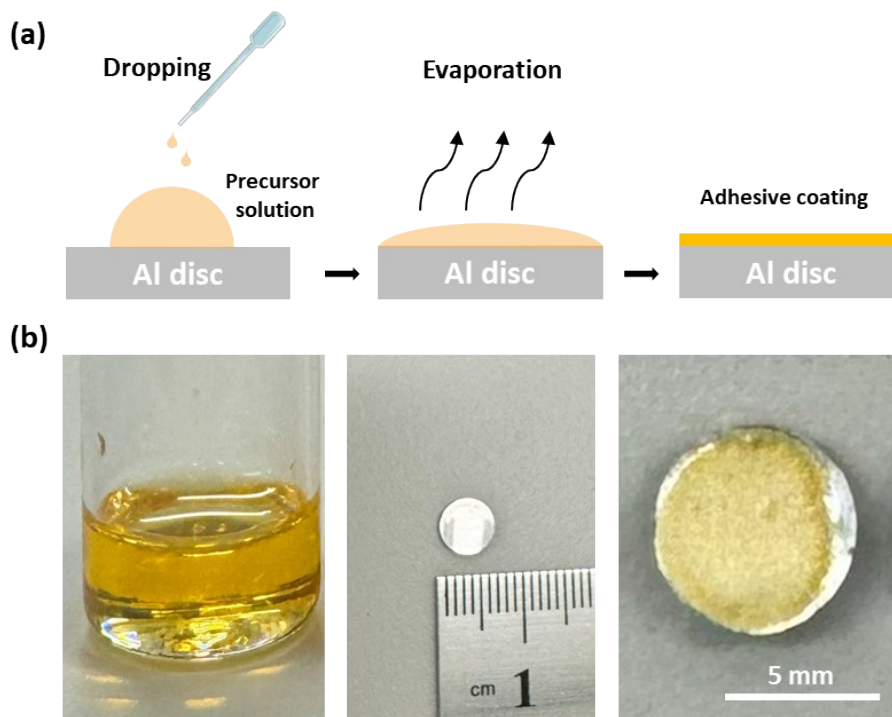

**Figure S2.** (a) Schematic diagram of the drop casting method. (b) Photographs of the adhesive precursor solution (left), Aluminum (Al) disc (middle), and adhesive-coated Al disc (right).

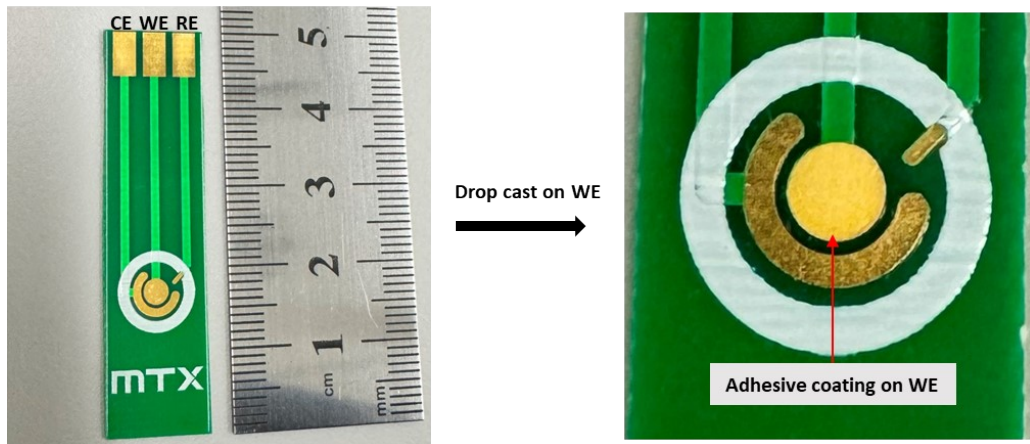

**Figure S3.** Images of the IDEs (left) and the adhesive-coated WE (right). Area of WE = 7 mm<sup>2</sup>.

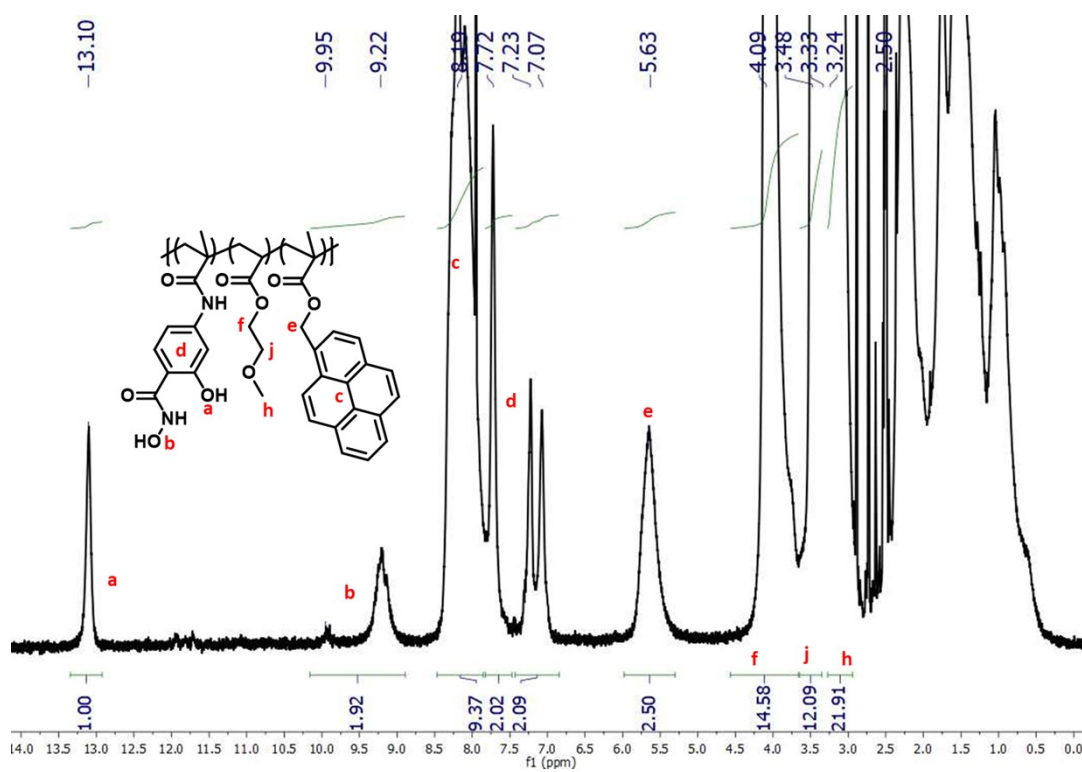

**Figure S4.** <sup>1</sup>H NMR spectra of SHA.

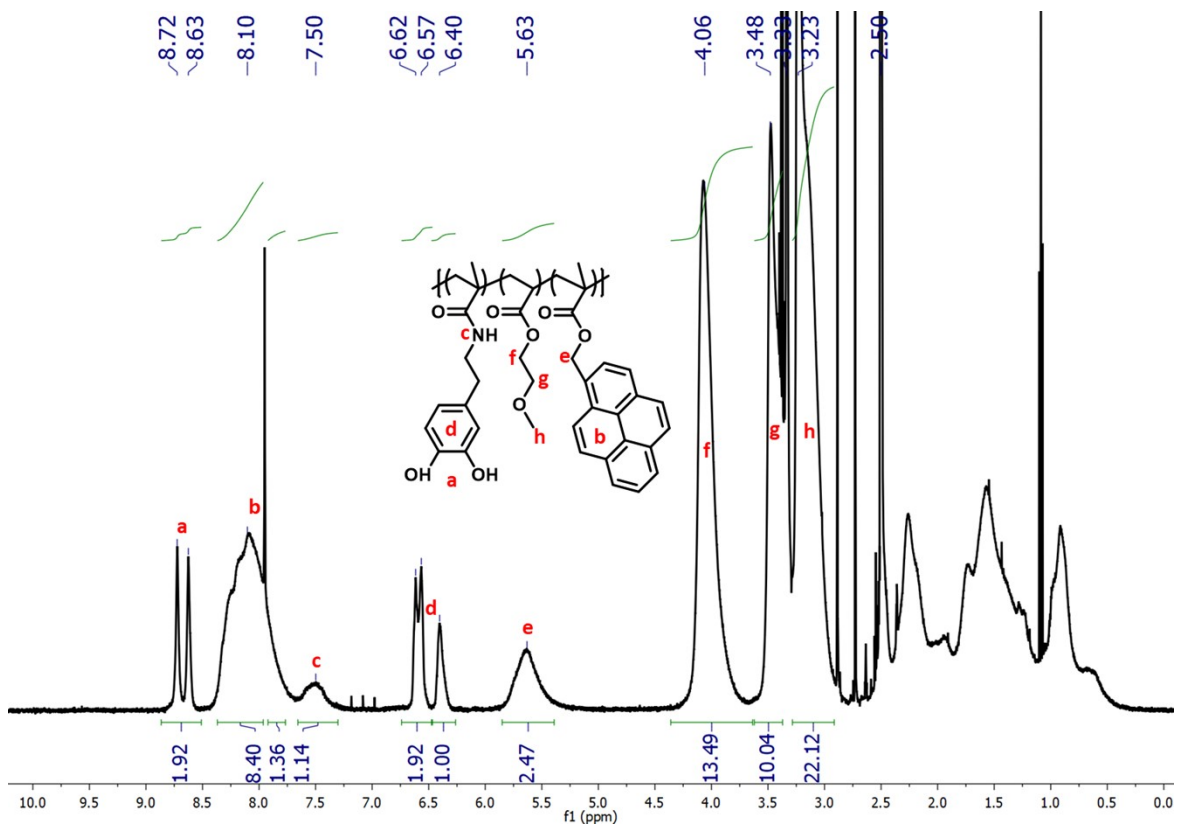

**Figure S5.**  $^1\text{H}$  NMR spectra of CAT.

**Table S1.** Molecular weights of polymers based on GPC analysis.

| Polymer | $M_n$ (g/mol)      | $M_w$ (g/mol)      | PDI  |
|---------|--------------------|--------------------|------|
| SHA     | $2.17 \times 10^5$ | $1.13 \times 10^6$ | 5.19 |
| CAT     | $1.63 \times 10^4$ | $3.50 \times 10^4$ | 2.14 |

**Table S2.** Redox peaks of two polymers based on CV analysis.

| Polymer | A1 (V) | C1(V) | C2(V) |
|---------|--------|-------|-------|
| SHA     | +0.54  | -0.31 | -0.98 |
| CAT     | +0.95  | -0.22 | -0.85 |

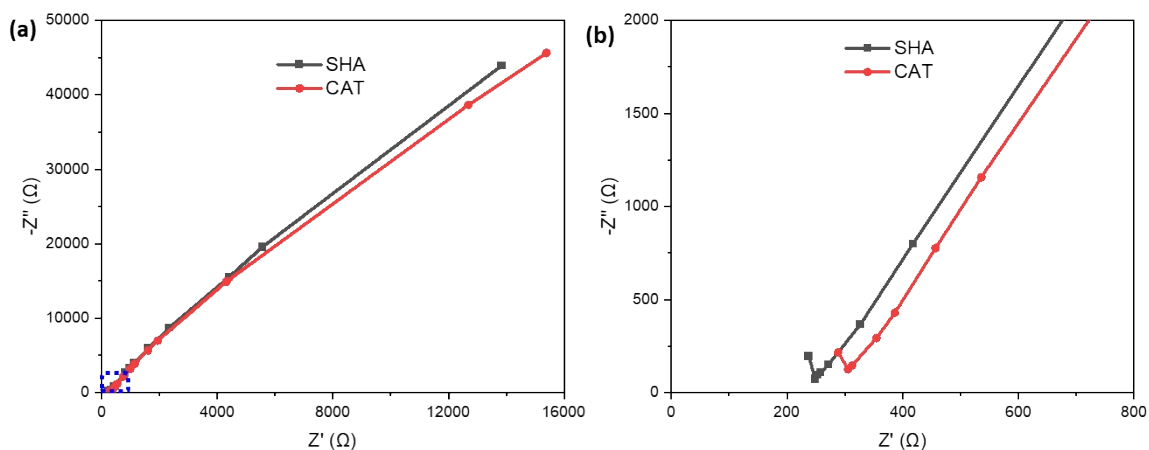

**Figure S6.** Nyquist plot of SHA and CAT. Panel (b) is a zoomed in plot from (a).

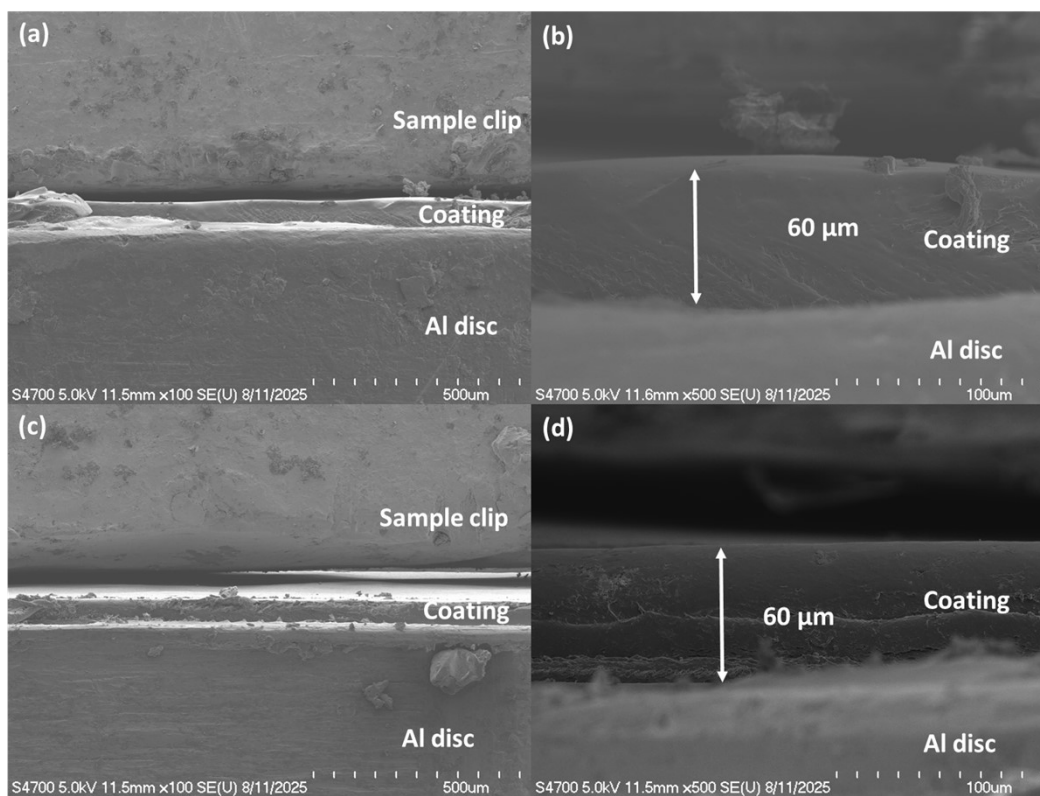

**Figure S7.** FE-SEM images of cross-section view of (a)(b) SHA-coated and (c)(d) CAT-coated Al disc.

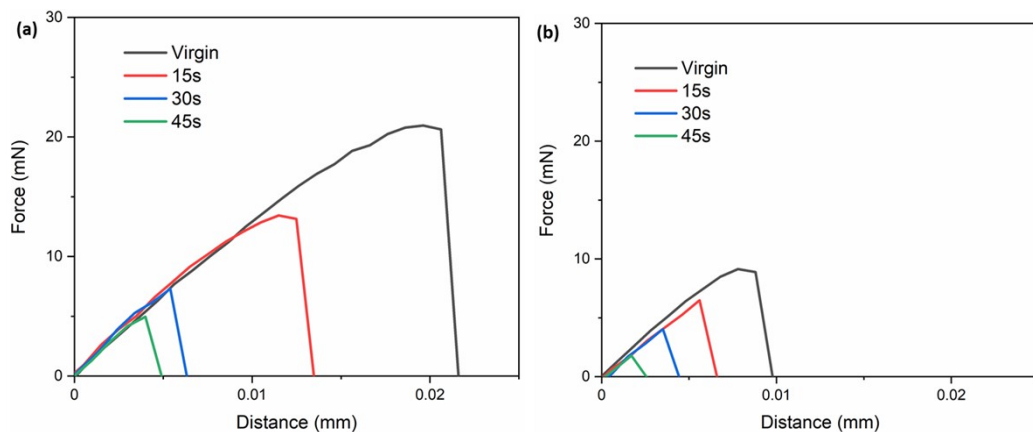

**Figure S8.** Typical JKR contact curves of (a) SHA and (b) CAT adhesive coatings with the application of 0.5V for 0s, 15s, 30s, and 45s. Voltage was applied using a Ti hemisphere and an Al disc as electrodes.

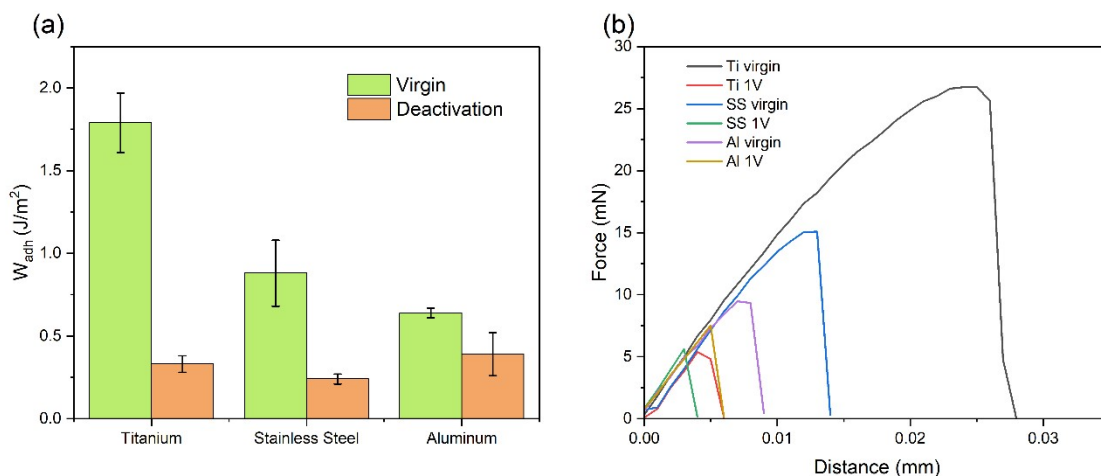

**Figure S9.** (a)  $W_{adh}$  and (b) JKR contact curves of SHA coating contacting different metal substrates before and after deactivation by 1V of applied potential for 30 seconds.

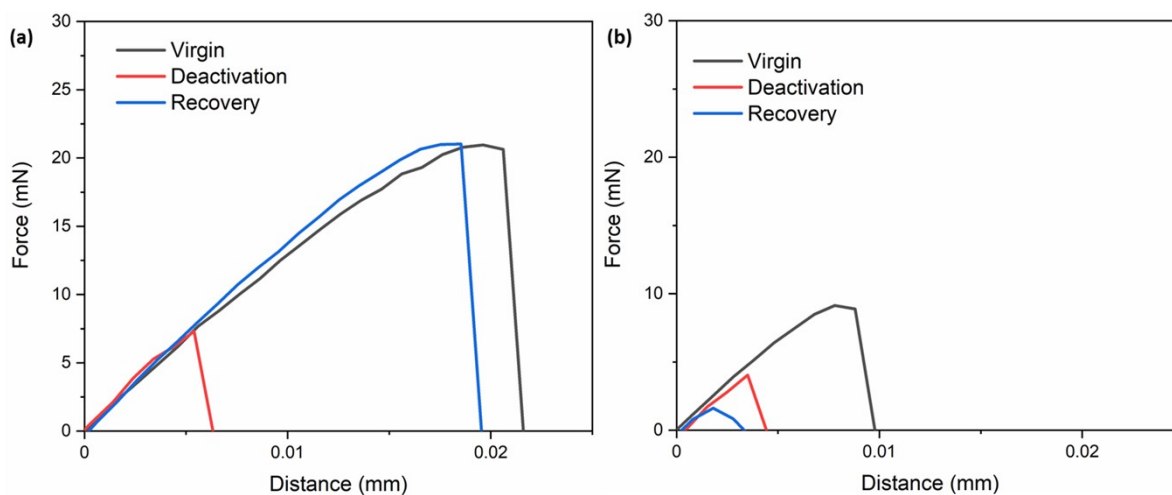

**Figure S10.** Representative JKR contact curves of (a) SHA and (b) CAT. SHAM-based adhesive showed recovered adhesive properties after application of 0.5V for 30s. Each deactivated sample was incubated in pH 5 for 30 mins to recover adhesive properties.

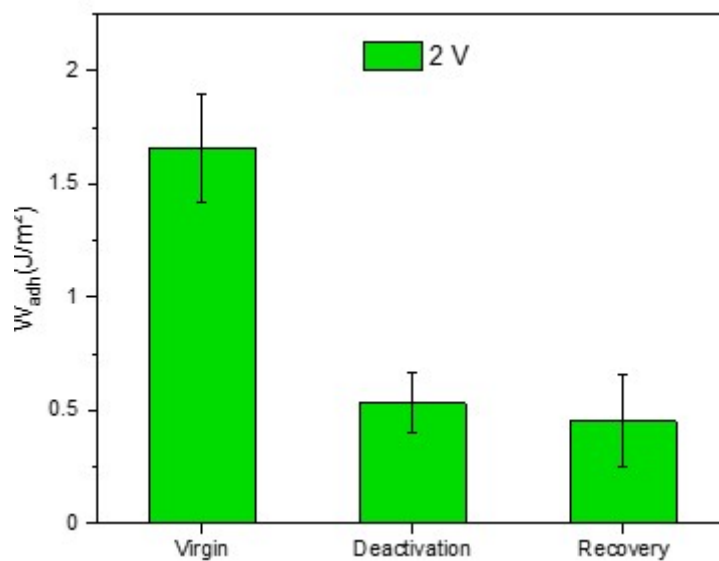

**Figure S11.**  $W_{adh}$  of SHA coating after deactivation at 2 V for 30 s and attempted recovery by reversing polarity and charging at 2 V for 30 s.

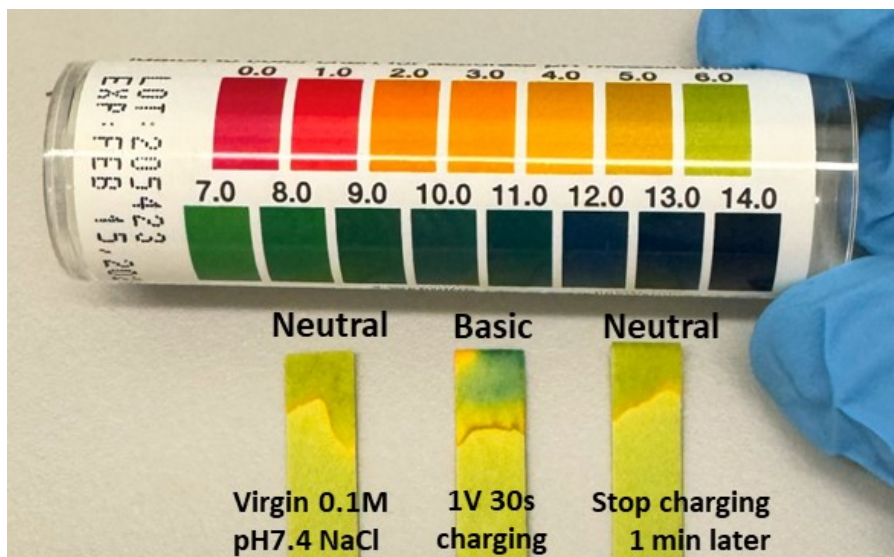

**Figure S12.** Photographs of litmus paper to track the changes in pH of the solution at the interface prior to application of electricity, after exposing to 1V for 30s, and 1 min after the exposure of applied electricity.

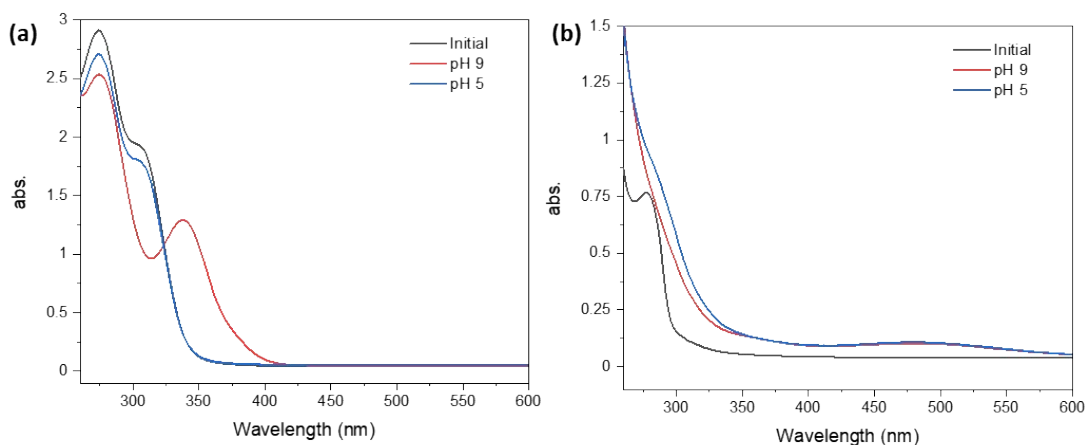

**Figure S13.** UV-vis spectra of 0.2 mM of (a) DHMAAB and (b) DMA measured before sequentially changing solution pH (initial measurement at pH 7.4), and after changing the pH to 9 and then 5. The pH was adjusted by dropwise addition of pH 14 NaCl solution and pH 0 HCl solution, respectively.

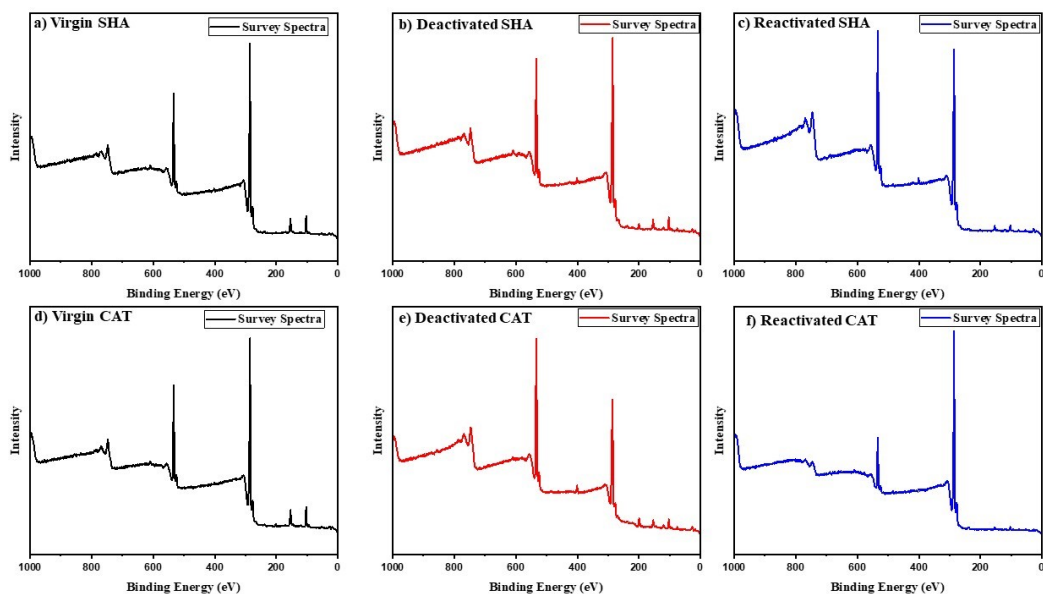

**Figure S14.** XPS survey spectra of the SHA (a-c) and CAT (d-f) adhesive coatings under virgin, electrochemically deactivated, and reactivated conditions show the presence of C, O, and N elements across all surface states.

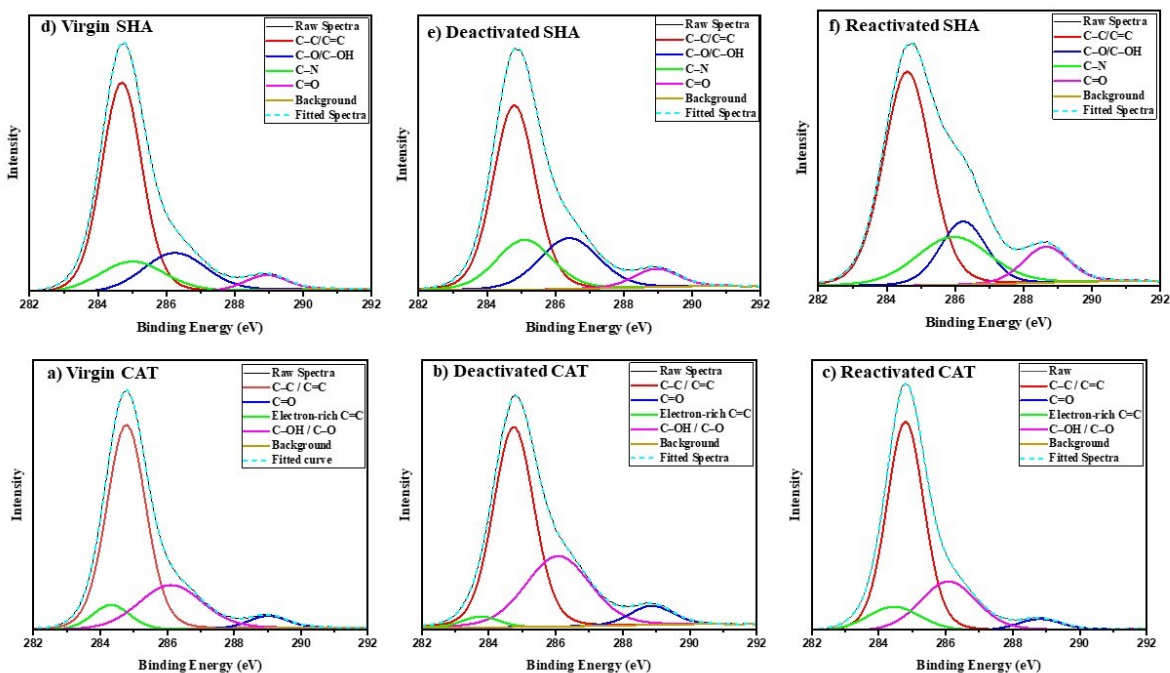

**Figure S15.** High- resolution C 1s XPS spectra of the SHA (a-c) and CAT (d-f) coatings in virgin (a,d), electrochemically deactivated (b,e), and reactivated states (c,f), featuring peak deconvolution into C-OH/C-O, C=O, absorbed oxygen, and transitory oxygen components.

**Table S3.** Summary of high-resolution C 1s XPS spectral deconvolution detailing peak positions and relative area percentages for SHA coatings in virgin, deactivated, and reactivated phases

| Assigned Carbon C 1s       | C–C/C=C | C–N    | C–O/C–OH | C=O   |
|----------------------------|---------|--------|----------|-------|
| <b>Virgin</b>              |         |        |          |       |
| <b>Binding Energy (eV)</b> | 284.70  | 285.00 | 286.24   | 288.9 |
| <b>% Area</b>              | 62.26   | 14.99  | 18.12    | 4.63  |
| <b>Deactivated</b>         |         |        |          |       |
| <b>Binding Energy (eV)</b> | 284.8   | 285.07 | 286.38   | 288.9 |
| <b>% Area</b>              | 53.83   | 19.01  | 21.53    | 5.63  |
| <b>Reactivated</b>         |         |        |          |       |
| <b>Binding Energy (eV)</b> | 284.6   | 285.94 | 286.2    | 288.6 |
| <b>% Area</b>              | 60.67   | 19.36  | 16.00    | 3.97  |

**Table S4.** Summary of high-resolution C 1s XPS spectral deconvolution detailing peak positions and relative area percentages for CAT coatings in virgin, deactivated, and reactivated phases

| Assigned Carbon C 1s       | Electron-rich C=C | C–C / C=C | C–OH / C–O | C=O    |
|----------------------------|-------------------|-----------|------------|--------|
| <b>Virgin</b>              |                   |           |            |        |
| <b>Binding Energy (eV)</b> | 284.63            | 284.78    | 286.09     | 288.97 |
| <b>% Area</b>              | 9.30              | 65.53     | 23.05      | 4.13   |
| <b>Deactivated</b>         |                   |           |            |        |
| <b>Binding Energy (eV)</b> | 283.76            | 284.74    | 286.06     | 288.86 |
| <b>% Area</b>              | 2.79              | 58.74     | 32.65      | 5.82   |
| <b>Reactivated</b>         |                   |           |            |        |
| <b>Binding Energy (eV)</b> | 284.45            | 284.79    | 286.07     | 288.79 |
| <b>% Area</b>              | 7.62              | 63.30     | 22.44      | 3.80   |

**Table S5.** Summary of high-resolution O1s XPS spectral deconvolution detailing peak positions and relative area percentages for SHA coatings in virgin, deactivated, and reactivated phases

| Assigned Oxygen (O 1s) | -C(=O)-NHOH | -C(=O)-N-OH / C <sub>6</sub> H <sub>4</sub> -OH | -C(=O)-N-O <sup>-</sup> / C <sub>6</sub> H <sub>4</sub> -O <sup>-</sup> | C <sub>6</sub> H <sub>4</sub> -OH··HO-H <sub>2</sub> O / -C(=O)-N-OH··H <sub>2</sub> O |
|------------------------|-------------|-------------------------------------------------|-------------------------------------------------------------------------|----------------------------------------------------------------------------------------|
| <b>Virgin</b>          |             |                                                 |                                                                         |                                                                                        |
| Binding Energy (eV)    | 531.94      | 533.10                                          | 534.20                                                                  | 534.39                                                                                 |
| % Area                 | 2.53        | 68.23                                           | 4.02                                                                    | 25.22                                                                                  |
| <b>Deactivated</b>     |             |                                                 |                                                                         |                                                                                        |
| Binding Energy (eV)    | 531.84      | 533.23                                          | 533.90                                                                  | 534.73                                                                                 |
| % Area                 | 2.52        | 63.23                                           | 14.10                                                                   | 20.15                                                                                  |
| <b>Reactivated</b>     |             |                                                 |                                                                         |                                                                                        |
| Binding Energy (eV)    | 531.58      | 533.01                                          | 533.81                                                                  | 534.30                                                                                 |
| % Area                 | 1.55        | 68.05                                           | 4.05                                                                    | 26.34                                                                                  |

**Table S6.** Summary of high-resolution O1s XPS spectral deconvolution detailing peak positions and relative area percentages for SHA coatings in virgin, deactivated, and reactivated phases

| Assigned Oxygen (O 1s) | C <sub>6</sub> H <sub>4</sub> (=O) <sub>2</sub> | C <sub>6</sub> H <sub>4</sub> (OH) <sub>2</sub> | C <sub>6</sub> H <sub>4</sub> (OH) <sub>2</sub> ··H <sub>2</sub> O / C <sub>6</sub> H <sub>4</sub> (=O) <sub>2</sub> ··H <sub>2</sub> O |
|------------------------|-------------------------------------------------|-------------------------------------------------|-----------------------------------------------------------------------------------------------------------------------------------------|
| <b>Virgin</b>          |                                                 |                                                 |                                                                                                                                         |
| Binding Energy (eV)    | 531.36                                          | 532.84                                          | 534.00                                                                                                                                  |
| % Area                 | 1.24                                            | 76.82                                           | 21.94                                                                                                                                   |
| <b>Deactivated</b>     |                                                 |                                                 |                                                                                                                                         |
| Binding Energy (eV)    | 531.74                                          | 533.02                                          | 534.30                                                                                                                                  |
| % Area                 | 5.14                                            | 53.15                                           | 41.70                                                                                                                                   |
| <b>Reactivated</b>     |                                                 |                                                 |                                                                                                                                         |
| Binding Energy (eV)    | 531.36                                          | 533.13                                          | 534.32                                                                                                                                  |
| % Area                 | 4.65                                            | 59.16                                           | 36.19                                                                                                                                   |

**Table S7.** Comparison of reversible adhesive systems.

| <b>Mechanism of Switching</b>                 | <b>Adhesive System</b>           | <b>Level of Applied Electricity</b> | <b>Work of Adhesion (J/m<sup>2</sup>)</b> | <b>Switching Ratio*</b> | <b>Reversible cycles</b> | <b>Ref.</b> |
|-----------------------------------------------|----------------------------------|-------------------------------------|-------------------------------------------|-------------------------|--------------------------|-------------|
| Electrochemical                               | SHAM-based adhesive              | 0.5-2 V                             | 1.6                                       | 5-7                     | 5                        | This Work   |
|                                               | Catechol with Phenylboronic acid | 1-2 V                               | 1.2                                       | 3-20                    | 5                        | 1           |
| Electricity induced electrostatic interaction | Polyelectrolyte-based adhesive   | 1-2V                                | 2.2                                       | 3                       | 30                       | 2           |
|                                               |                                  | 10V                                 | -                                         | 15-25                   | 10                       | 3           |
| Electrothermal Responsive                     | Hydrogen bonding-based adhesive  | 4-8V                                | -                                         | 1.1-1.3                 | 2                        | 4           |

\* Switching ratio is defined as the ratio between the maximum and minimum adhesion values.

## References:

1. M. S. A. Bhuiyan, B. Liu, J. Manuel, B. Zhao and B. P. Lee, Effect of Conductivity on In Situ Deactivation of Catechol–Boronate Complexation-Based Reversible Smart Adhesive, *Biomacromol.*, 2021, **22**, 4004-4015.
2. H. J. Kim, L. Paquin, C. W. Barney, S. So, B. Chen, Z. Suo, A. J. Crosby and R. C. Hayward, Low-Voltage Reversible Electroadhesion of Ionoelastomer Junctions, *Adv. Mat.*, 2020, **32**, 2000600.
3. S. Lu, Z. Ma, M. Ding, Y. Wu, Y. Chen, M. Dong and L. Qin, Reversible electroadhesion induced through low ion concentration migration for biomedical applications, *Chemical Engineering Journal*, 2024, **486**, 150393.
4. Q. Deng, S. Han, Y. Wu, Y. Chen, Y. Zhang, Y. Zhao, S. Chen and J. Zhu, Robust and Reversible Thermal/Electro-Responsive Supramolecular Polymeric Adhesives via Synergistic Hydrogen-Bonds and Ionic Junctions, *Angew. Chem., Int. Ed.*, 2025, **64**, e202415386.
